# Supplementary material
Source: ML conference proceedings conference paper supplement (https://openaccess.thecvf.com/content/CVPR2023/html/Wang_Pixels_Regions_and_CVPR_2023_paper.html)
Supplement: Supplementary file 1 [file Wang_Pixels_Regions_and_CVPR_2023_supplemental.pdf]

The predicted saliency maps of MENet for six datasets are available at the following link:

<https://pan.baidu.com/s/1PqS17pX1y1GEqPC7I3NdbQ?pwd=j9wk>

The codes of MENet are available at:

<https://github.com/yiwangtz/MENet>
